# Supplementary material for: Effects of Tegoprazan Versus Esomeprazole on Nighttime Heartburn and Sleep Quality in Gastroesophageal Reflux Disease: A Multicenter Double-blind Randomized Controlled Trial
Source: PubMed Central journal article supplement — J Neurogastroenterol Motil. 2023 Jan 30;29(1):58–64. doi: 10.5056/jnm22104 (PMC9837551; doi:10.5056/jnm22104), 2023-01-30
Supplement: jnm-29-1-58-supple.pdf [file jnm-29-1-58-supple.pdf]

**Supplementary Table.** Changes in Symptom Score of Korean Gastrointestinal Symptom Rating Scale in Each Group

| KGSRS scores   | Tegoprazan 50 mg (n = 22) |             |              |                              | Esomeprazole 40 mg (n = 24) |             |              |                              |
|----------------|---------------------------|-------------|--------------|------------------------------|-----------------------------|-------------|--------------|------------------------------|
|                | Baseline                  | Week 2      | Change       | <i>P</i> -value <sup>a</sup> | Baseline                    | Week 2      | Change       | <i>P</i> -value <sup>a</sup> |
| Reflux         | 33.8 ± 27.0               | 14.5 ± 19.3 | -19.3 ± 24.5 | 0.0004                       | 31.5 ± 21.5                 | 19.8 ± 18.9 | -11.7 ± 19.7 | 0.0107                       |
| Abdominal pain | 27.5 ± 23.7               | 12.7 ± 21.2 | -14.8 ± 14.9 | 0.0001                       | 18.9 ± 19.4                 | 13.2 ± 14.3 | -5.7 ± 17.0  | 0.1129                       |
| Indigestion    | 32.2 ± 27.6               | 23.3 ± 21.3 | -8.8 ± 14.8  | 0.0078                       | 31.1 ± 18.8                 | 24.2 ± 20.5 | -6.9 ± 15.2  | 0.0033                       |
| Diarrhea       | 17.2 ± 20.4               | 10.2 ± 15.9 | -7.0 ± 11.4  | 0.0073                       | 9.4 ± 14.5                  | 8.5 ± 12.3  | -0.9 ± 15.2  | 0.9683                       |
| Constipation   | 14.6 ± 23.2               | 12.7 ± 25.8 | -1.9 ± 14.2  | 0.1367                       | 15.5 ± 19.9                 | 13.4 ± 18.5 | -2.2 ± 16.6  | 0.2095                       |

<sup>a</sup>Paired *t* test or Wilcoxon signed rank test.

KGSRS, Korean gastrointestinal symptom rating scale; Change = Week 2 – Baseline.

Data are presented as mean ± SD.
